# Supplementary material
Source: publisher figshare collection journal article supplement (https://karger.figshare.com/articles/dataset/_/28822670)
Supplement: Supplementary file 1 [file 1]

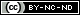

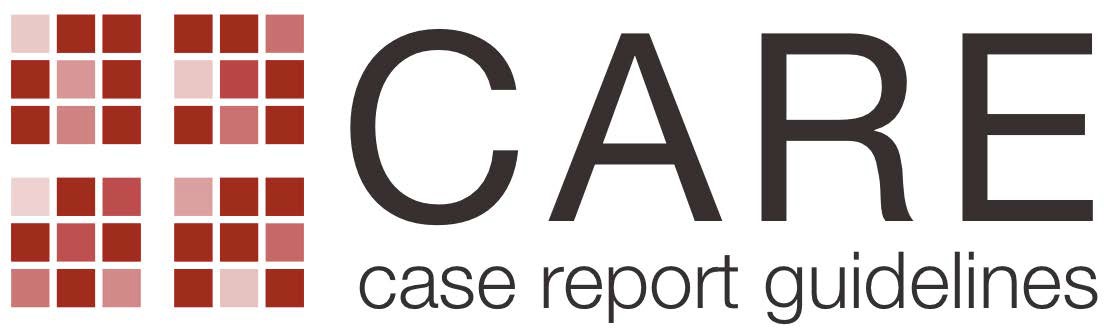
Supplementary Material B: CARE checklist

**Topic Item Checklist item description Reported on Line**

**Title 1** The diagnosis or intervention of primary focus followed by the words “case report” . . . . . . . . . . . . . . . . . . 1

**Key Words 2** 2 to 5 key words that identify diagnoses or interventions in this case report, including "case report" 1

**Abstract**

**(no references)**

**3a** Introduction: What is unique about this case and what does it add to the scientific literature? 2

**3b** Main symptoms and/or important clinical findings . . . . . . . . . . . . . . . . . . . . . . . . . . . . . . . . . . . . . . . . . . . . . . . . . . . 2

**3c** The main diagnoses, therapeutic interventions, and outcomes 2

**3d** Conclusion—What is the main “take-away” lesson(s) from this case? 2

**Introduction 4** One or two paragraphs summarizing why this case is unique (**may include references**) 3-4

**Patient Information 5a** De-identified patient specific information 4

**5b** Primary concerns and symptoms of the patient 4

**5c** Medical, family, and psycho-social history including relevant genetic information 4-5

**5d** Relevant past interventions with outcomes 4

**Clinical Findings**

**Timeline**

**Diagnostic Assessment**

**Therapeutic Intervention**

**Follow-up and Outcomes**

1. Describe significant physical examination (PE) and important clinical findings 4-5
2. Historical and current information from this episode of care organized as a timeline 4-6

**8a** Diagnostic testing (such as PE, laboratory testing, imaging, surveys). 5

**8b** Diagnostic challenges (such as access to testing, financial, or cultural) N/A

**8c** Diagnosis (including other diagnoses considered) 5

**8d** Prognosis (such as staging in oncology) where applicable 5

**9a** Types of therapeutic intervention (such as pharmacologic, surgical, preventive, self-care) . . . . . . . . . . . . . . . . . 6

**9b** Administration of therapeutic intervention (such as dosage, strength, duration) 6

**9c** Changes in therapeutic intervention (with rationale) 6-7;11

**10a** Clinician and patient-assessed outcomes (if available) 8-9

**10b** Important follow-up diagnostic and other test results 8-9; 11

**10c** Intervention adherence and tolerability (How was this assessed?) 7

**10d** Adverse and unanticipated events 11

**Discussion 11a** A scientific discussion of the strengths AND limitations associated with this case report 9-13

**11b** Discussion of the relevant medical literature **with references** 9-12

**11c** The scientific rationale for any conclusions (including assessment of possible causes) 9-12

**11d** The primary “take-away” lessons of this case report (without references) in a one paragraph conclusion 12

**Patient Perspective 12** The patient should share their perspective in one to two paragraphs on the treatment(s) they received . . . . N/A

**Informed Consent 13** Did the patient give informed consent? Please provide if requested . . . . . . . . . . . . . . . . . . . . . . . . . . . . . . . . . . . . . . **Yes X** **No
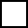
**
